# Supplementary material
Source: PubMed Central journal article supplement (PMC7502525)

Supplemental Table 1. Demographic characteristics of propensity score-matched patients.

|                                  | No adjuvant therapy<br>n=71 (%) | Adjuvant chemo with or without radiation<br>n=71 (%) | Standardized Mean Differences | p-value |
|----------------------------------|---------------------------------|------------------------------------------------------|-------------------------------|---------|
| Age (years, median with IQR)     | 66(53-74)                       | 60(54-68)                                            |                               | 0.04    |
| Age <50 years                    | 15(21)                          | 14(20)                                               | 0.03                          | 1.00    |
| Sex (female)                     | 11(16)                          | 12(17)                                               | 0.04                          | 1.00    |
| Race                             |                                 |                                                      |                               | 1.00    |
| White                            | 70(99)                          | 69(97)                                               |                               |         |
| Black                            | 0(0)                            | 0(0)                                                 |                               |         |
| Other                            | 1(1)                            | 2(3)                                                 |                               |         |
| Year of diagnosis, median (IQR)  | 2008(2006-2010)                 | 2008(2006-2009)                                      |                               | 1.00    |
| CDCC Score                       |                                 |                                                      |                               | 0.92    |
| 0                                | 50(70)                          | 48(68)                                               |                               |         |
| 1                                | 16(23)                          | 18(25)                                               | 0.06                          |         |
| 2+                               | 5(7)                            | 5(7)                                                 | 0.00                          |         |
| Insurance status                 |                                 |                                                      |                               | 0.17    |
| Government                       | 43(61)                          | 33(47)                                               |                               |         |
| Private                          | 26(37)                          | 37(52)                                               |                               |         |
| None                             | 2(3)                            | 1(1)                                                 |                               |         |
| Facility type                    |                                 |                                                      |                               | 0.87    |
| Academic/research program        | 32(45)                          | 34(48)                                               | 0.06                          |         |
| Pathologic T stage               |                                 |                                                      |                               | 1.00    |
| 2                                | 21(30)                          | 20(28)                                               |                               |         |
| 3 or 4a                          | 50(70)                          | 51(72)                                               | 0.03                          |         |
| Tumor size (mm, median with IQR) | 33(23-45)                       | 30(22-46)                                            | 0.01                          | 0.64    |
| Grade                            |                                 |                                                      |                               | 1.00    |
| Well/moderately differentiated   | 10(14)                          | 11(16)                                               | 0.01                          |         |
| Poorly differentiated            | 61(86)                          | 60(84)                                               |                               |         |
| Lymphovascular invasion          | 12(17)                          | 11(16)                                               | 0.06                          | 1.00    |
| Adjuvant radiation               | 0(0)                            | 47(66)                                               |                               | <0.001  |
| Median survival (months) (IQR)   | 40(31-N/A)                      | 48(35-72)                                            |                               | 0.81    |
| Mortality events                 | 40(56)                          | 46(65)                                               |                               | 0.39    |
| Median follow-up (months) (IQR)  | 33(15-68)                       | 41(22-66)                                            |                               | 0.36    |

IQR indicates Interquartile Range, CDCC, Charlson-Deyo Comorbidity Index

Supplemental Table 2. Number of NCCN 'high risk' factors in cohort, stratified by receipt of adjuvant chemotherapy with or without radiation.

| <b>High Risk Factors (number)</b> | <b>No adjuvant therapy</b> | <b>Adjuvant chemotherapy with or without radiation</b> |
|-----------------------------------|----------------------------|--------------------------------------------------------|
| 1                                 | 276                        | 70                                                     |
| 2                                 | 36                         | 20                                                     |
| 3                                 | 1                          | 0                                                      |

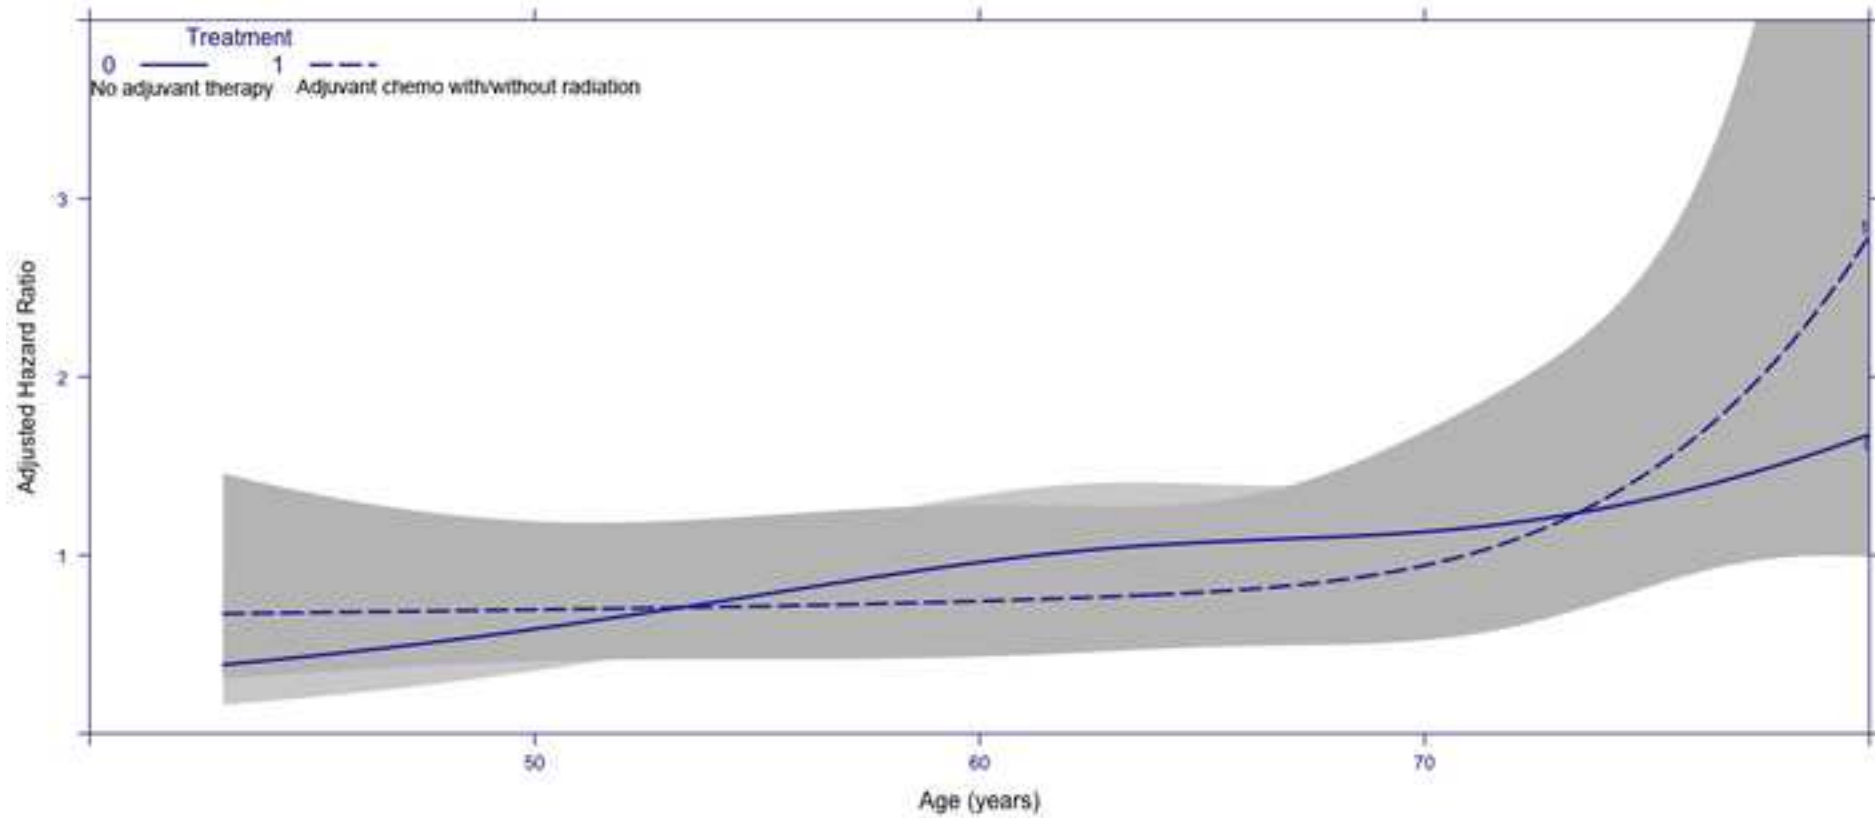

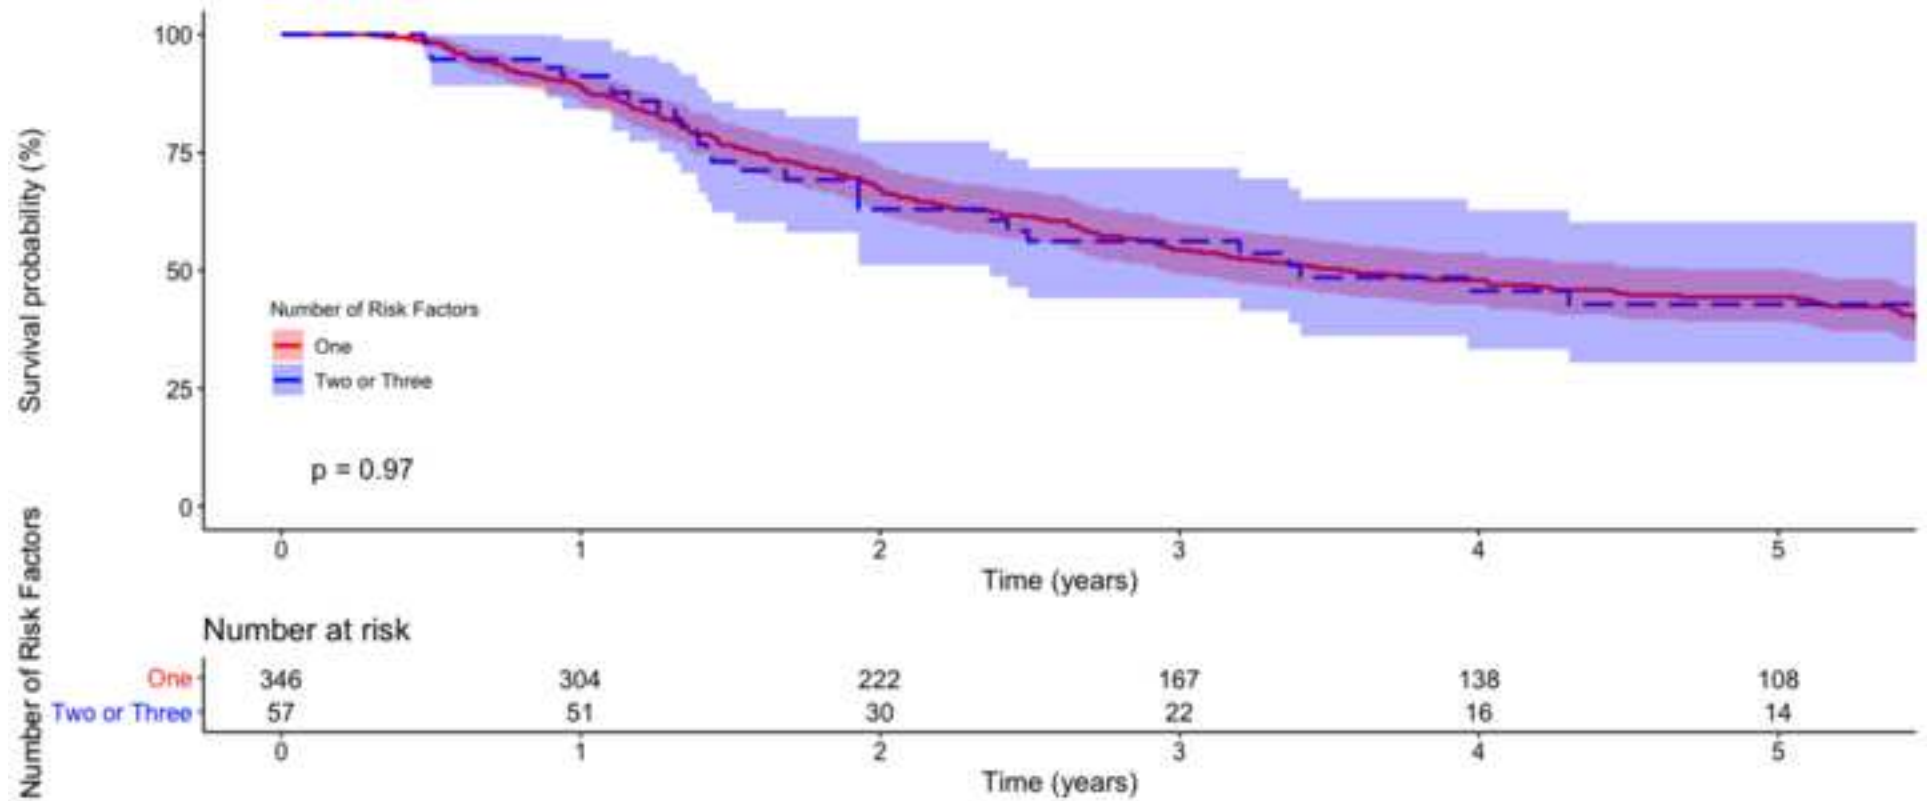

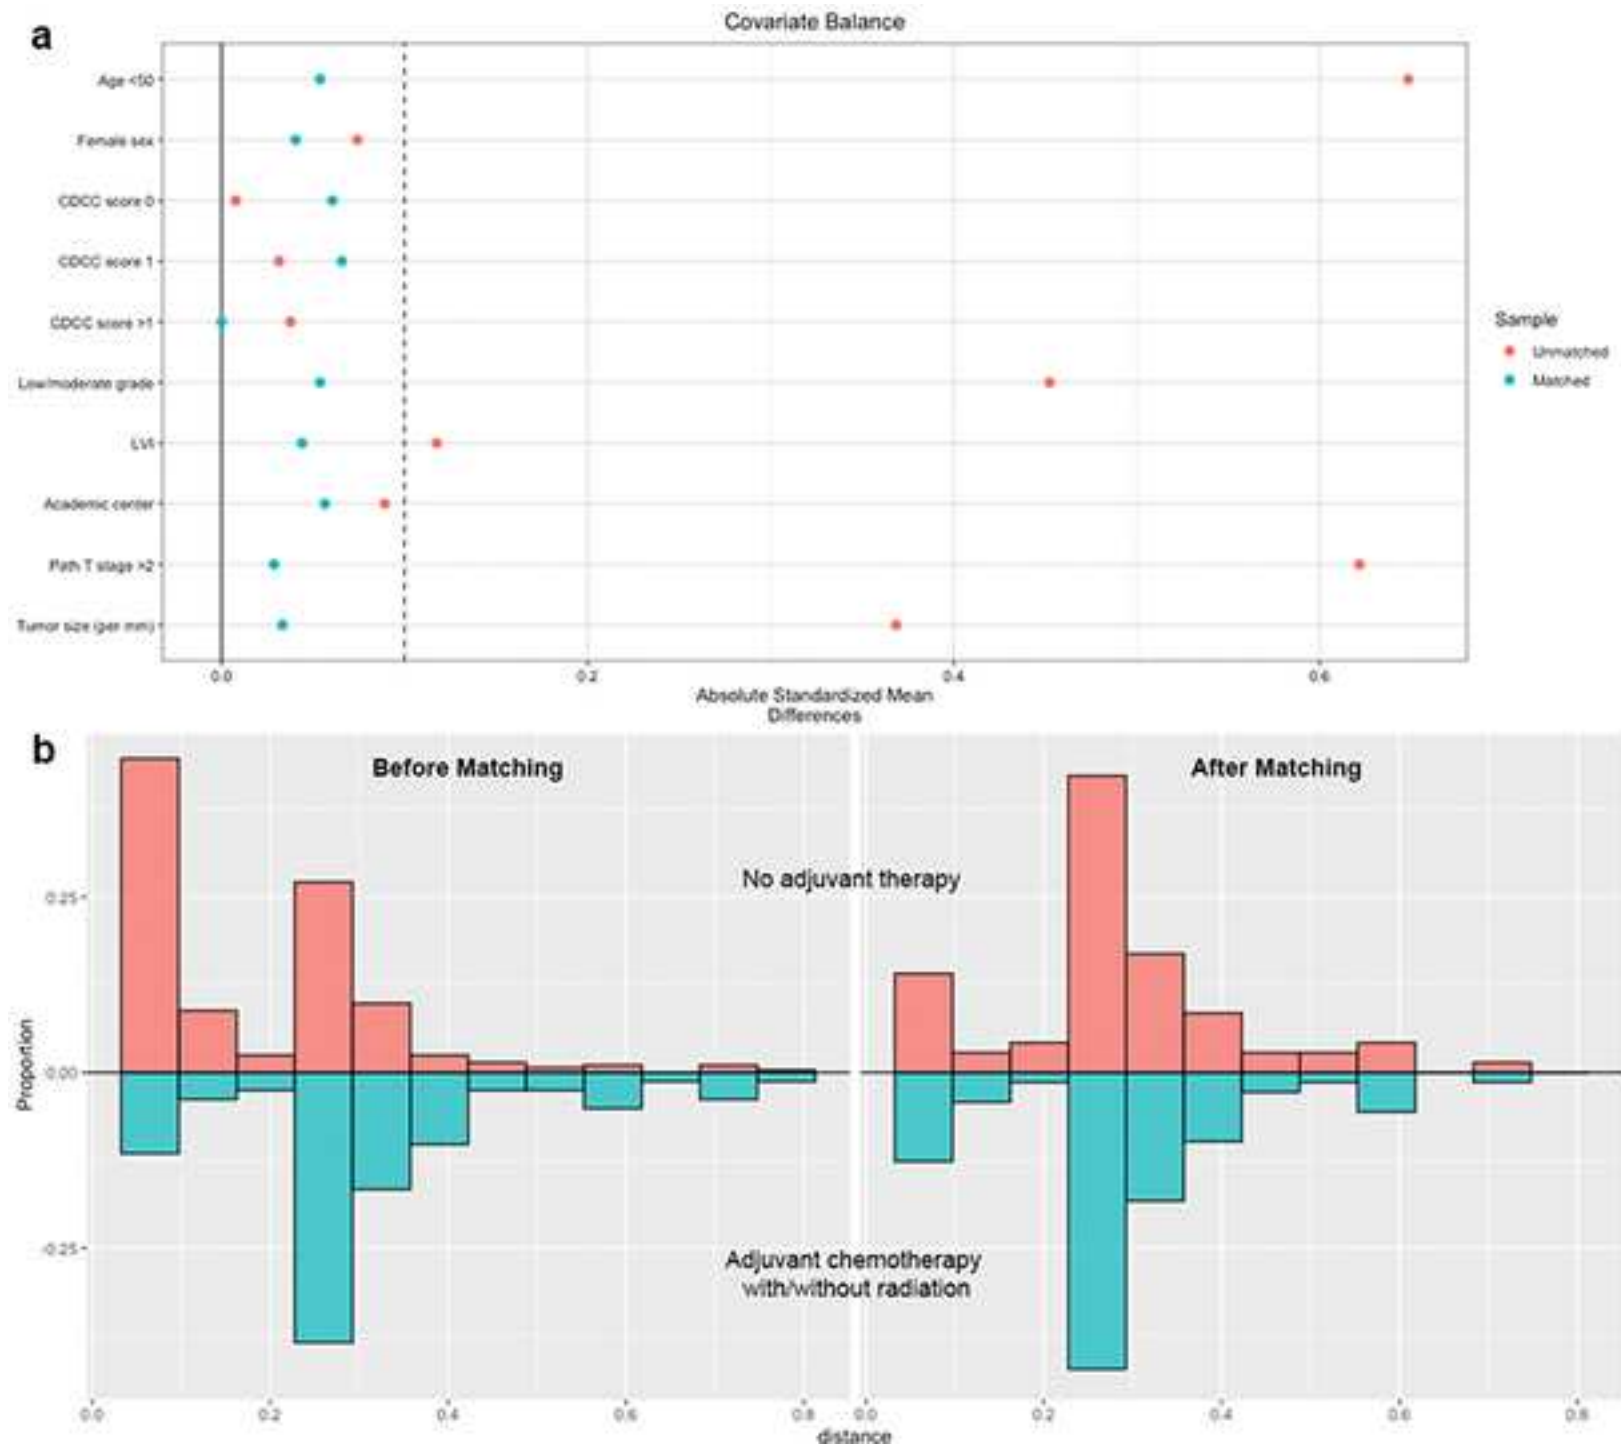

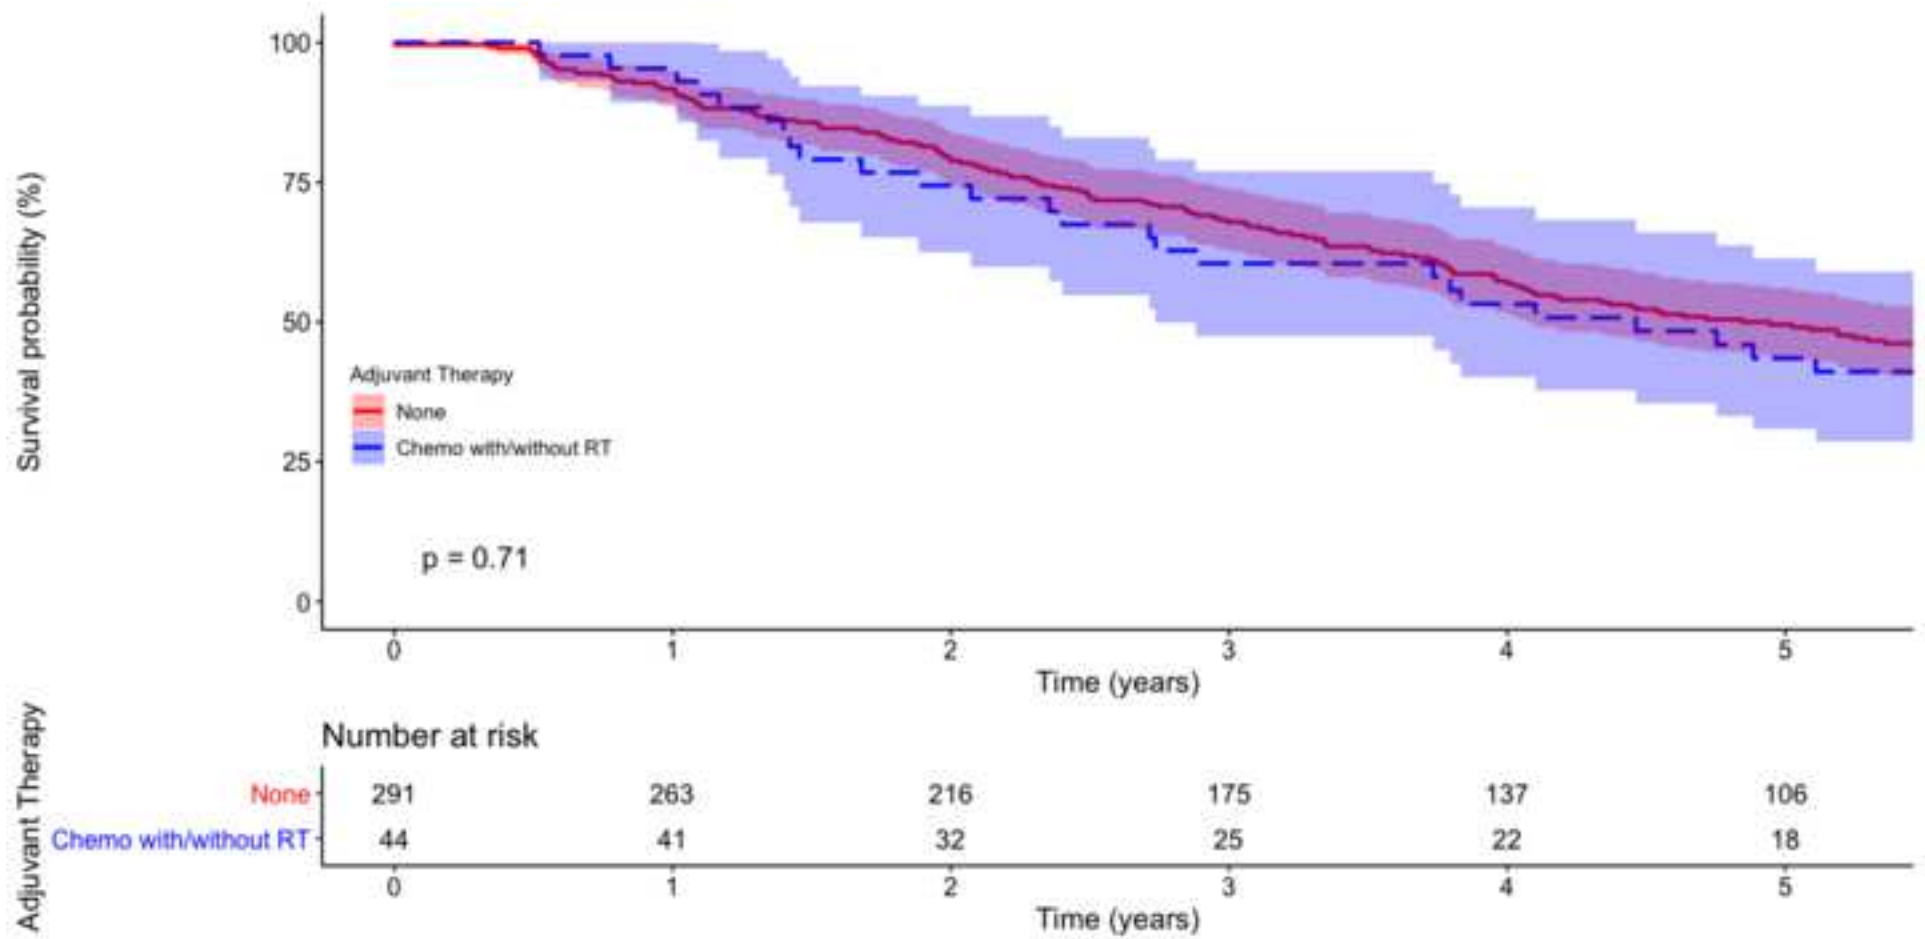

Supplement: NIHMS1601492-supplement-1.pdf [file NIHMS1601492-supplement-1.pdf]
